# Supplementary material
Source: publisher figshare collection journal article supplement (https://gsajournals.figshare.com/articles/dataset/_/11783619)
Supplement: Supplementary file [file 1]

**A**

X      2L      2R      3L      3R

1  
0.8  
0.6  
0.4  
0.2  
0

**B**

Heatmap showing the correlation matrix for the variables: X, 2L, 2R, 3L, 3R, 4L, 4R, 5L, 5R, 6L. The color scale ranges from 0 (dark blue) to 1 (yellow). The diagonal is bright yellow (1.0). The 3L-3R block shows high correlation (yellow/orange). The 4L-4R block shows moderate correlation (light green). The 5L-5R block shows low correlation (light blue). The 6L-6R block shows very low correlation (dark blue).
